# Supplementary material for: Education Level Is a Strong Prognosticator in the Subgroup Aged More Than 50 Years Regardless of the Molecular Subtype of Breast Cancer: A Study Based on the Nationwide Korean Breast Cancer Registry Database
Source: PubMed Central journal article supplement — Cancer Res Treat. 2017 Feb 2;49(4):1114–26. doi: 10.4143/crt.2016.528 (PMC5654170; doi:10.4143/crt.2016.528), 2017-02-02
Supplement: crt-2016-528-suppl1.pdf [file crt-2016-528-suppl1.pdf]

**S1 Table.** Clinicopathologic characteristics according to the education level in the subgroup aged  $\leq 50$  years and in the subgroup aged  $> 50$  years

| Characteristic          | Education level (age $\leq 50$ yr) |                   |                                     | Education level (age $> 50$ yr) |                   |                                     |
|-------------------------|------------------------------------|-------------------|-------------------------------------|---------------------------------|-------------------|-------------------------------------|
|                         | Low                                | High              | Chi-square <sup>a)</sup><br>p-value | Low                             | High              | Chi-square <sup>a)</sup><br>p-value |
| Total                   | 5,932 (15.8)                       | 31,602 (84.2)     |                                     | 14,489 (54.5)                   | 12,101 (45.5)     |                                     |
| Age, mean $\pm$ SD (yr) | 45.65 $\pm$ 3.965                  | 42.05 $\pm$ 5.656 | < 0.001                             | 61.64 $\pm$ 7.892               | 57.65 $\pm$ 6.447 | < 0.001                             |
| Tumor size (cm)         |                                    |                   |                                     |                                 |                   |                                     |
| $\leq 2$                | 2,931 (50.3)                       | 17,549 (56.9)     | < 0.001                             | 7,740 (54.4)                    | 7,406 (62.8)      | < 0.001                             |
| $> 2$                   | 2,894 (49.7)                       | 13,275 (43.1)     |                                     | 6,478 (45.6)                    | 4,381 (37.2)      |                                     |
| Node positivity         |                                    |                   |                                     |                                 |                   |                                     |
| No                      | 3,458 (58.7)                       | 19,651 (62.9)     | < 0.001                             | 9,000 (62.8)                    | 8,071 (67.5)      | < 0.001                             |
| Yes                     | 2,428 (41.3)                       | 11,600 (37.1)     |                                     | 5,324 (37.2)                    | 3,883 (32.5)      |                                     |
| Stage                   |                                    |                   |                                     |                                 |                   |                                     |
| I                       | 2,121 (36.5)                       | 13,334 (43.5)     | < 0.001                             | 5,890 (41.8)                    | 5,839 (49.8)      | < 0.001                             |
| II, III                 | 3,686 (63.5)                       | 17,308 (56.5)     |                                     | 8,209 (58.2)                    | 5,876 (50.2)      |                                     |
| Hormonal receptor       |                                    |                   |                                     |                                 |                   |                                     |
| Negative                | 1,637 (30.7)                       | 7,555 (25.9)      | < 0.001                             | 4,495 (34.2)                    | 3,475 (31.0)      | < 0.001                             |
| Positive                | 3,695 (69.3)                       | 21,605 (74.1)     |                                     | 8,636 (65.8)                    | 7,734 (69.0)      |                                     |
| HER2                    |                                    |                   |                                     |                                 |                   |                                     |
| Negative                | 3,032 (73.2)                       | 18,868 (77.7)     | < 0.001                             | 7,736 (71.8)                    | 6,918 (72.5)      | 0.218                               |
| Positive                | 1,111 (26.8)                       | 5,415 (22.3)      |                                     | 3,043 (28.2)                    | 2,618 (27.5)      |                                     |
| Histologic grade        |                                    |                   |                                     |                                 |                   |                                     |
| 1, 2                    | 3,010 (62.3)                       | 17,210 (64.5)     | 0.003                               | 7,533 (62.3)                    | 6,701 (64.4)      | 0.001                               |
| 3                       | 1,822 (37.7)                       | 9,478 (35.5)      |                                     | 4,558 (37.7)                    | 3,700 (35.6)      |                                     |
| Lymphovascular invasion |                                    |                   |                                     |                                 |                   |                                     |
| No                      | 2,348 (57.1)                       | 14,720 (62.8)     | < 0.001                             | 6,948 (64.7)                    | 6,261 (68.7)      | < 0.001                             |
| Yes                     | 1,762 (42.9)                       | 8,727 (37.2)      |                                     | 3,794 (35.3)                    | 2,857 (31.3)      |                                     |
| Body mass index         |                                    |                   |                                     |                                 |                   |                                     |
| $\leq 25$               | 3,723 (64.1)                       | 24,982 (80.3)     | < 0.001                             | 7,447 (52.7)                    | 7,950 (66.7)      | < 0.001                             |
| $> 25$                  | 2,083 (35.9)                       | 6,146 (19.7)      |                                     | 6,696 (47.3)                    | 3,965 (33.3)      |                                     |
| Operation period        |                                    |                   |                                     |                                 |                   |                                     |
| 1987-2005               | 3,034 (51.1)                       | 9,121 (28.9)      | < 0.001                             | 4,139 (28.6)                    | 2,277 (18.8)      | < 0.001                             |
| 2006-2010               | 2,103 (35.5)                       | 11,500 (36.4)     |                                     | 5,274 (36.4)                    | 4,099 (33.9)      |                                     |

|                   |              |               |         |              |              |         |
|-------------------|--------------|---------------|---------|--------------|--------------|---------|
| 2011-2014         | 795 (13.4)   | 10,981 (34.7) |         | 5,076 (35.0) | 5,725 (47.3) |         |
| Operation         |              |               |         |              |              |         |
| Lumpectomy        | 2,753 (47.5) | 18,373 (59.2) | < 0.001 | 6,814 (47.8) | 7,055 (59.2) | < 0.001 |
| Mastectomy        | 3,038 (52.5) | 12,640 (40.8) |         | 7,437 (52.2) | 4,863 (40.8) |         |
| Radiation therapy |              |               |         |              |              |         |
| No                | 2,074 (40.9) | 8,948 (32.1)  | < 0.001 | 5,317 (43.5) | 3,571 (33.8) | < 0.001 |
| Yes               | 3,000 (59.1) | 18,885 (67.9) |         | 6,915 (56.5) | 6,994 (66.2) |         |
| Chemotherapy      |              |               |         |              |              |         |
| No                | 899 (16.8)   | 7,293 (25.3)  | < 0.001 | 4,018 (31.7) | 3,610 (33.0) | 0.029   |
| Yes               | 4,466 (83.2) | 21,535 (74.7) |         | 8,661 (68.3) | 7,321 (67.0) |         |
| Hormonal therapy  |              |               |         |              |              |         |
| No                | 1,524 (40.6) | 7,719 (35.3)  | < 0.001 | 3,955 (44.9) | 3,354 (40.1) | < 0.001 |
| Yes               | 2,232 (59.4) | 14,170 (64.7) |         | 4,859 (55.1) | 5,017 (59.9) |         |

Values are presented as number (%) unless otherwise indicated. SD, standard deviation; HER2, human epidermal growth factor receptor 2. <sup>a)</sup>p-values for mean age were calculated by t test and all the other p-values were calculated by chi-square test.
