# Supplementary material for: Education Level Is a Strong Prognosticator in the Subgroup Aged More Than 50 Years Regardless of the Molecular Subtype of Breast Cancer: A Study Based on the Nationwide Korean Breast Cancer Registry Database
Source: PubMed Central journal article supplement — Cancer Res Treat. 2017 Feb 2;49(4):1114–26. doi: 10.4143/crt.2016.528 (PMC5654170; doi:10.4143/crt.2016.528), 2017-02-02
Supplement: crt-2016-528-suppl2.pdf [file crt-2016-528-suppl2.pdf]

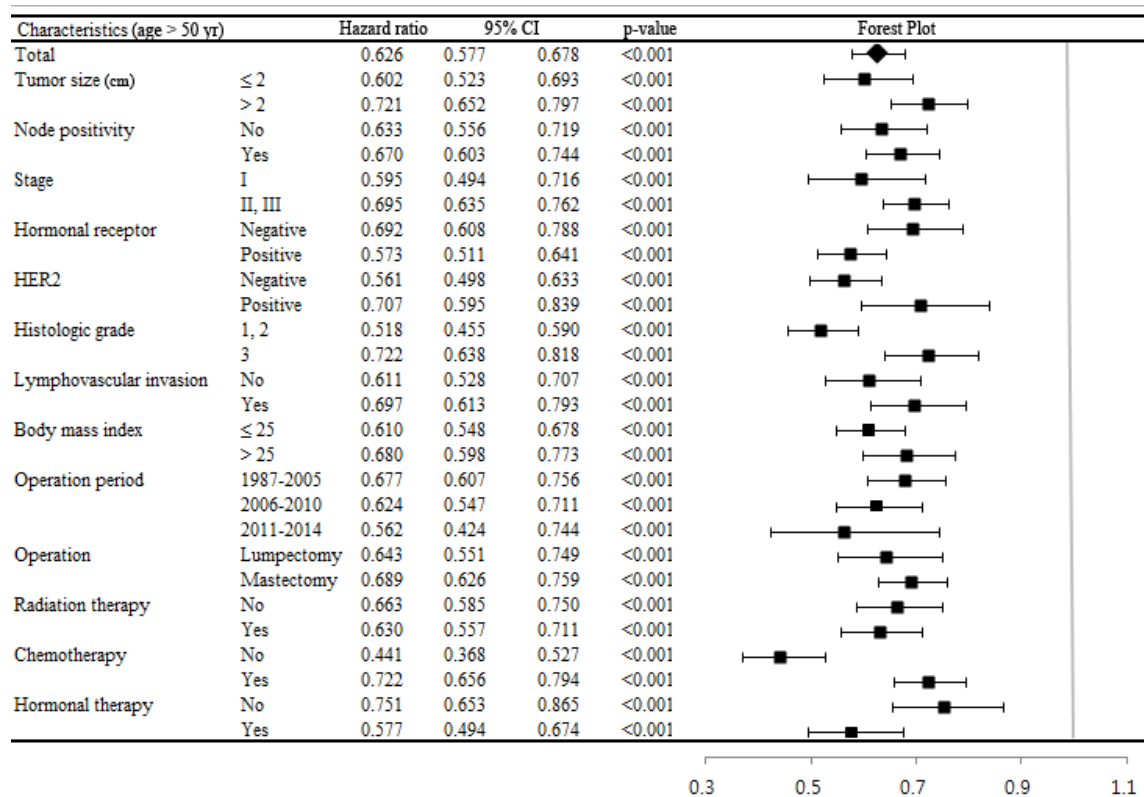

**S2 Fig.** Subgroup analyses with a forest plot for the effect of the education level with respect to overall survival according to clinicopathologic characteristics in the subgroup aged > 50 years. In the forest plot, a HR value less than 1 favors high EL against low EL. CI, confidence interval; HER2, human epidermal growth factor receptor 2; HR, hazard ratio.
