# Supplementary material for: Education Level Is a Strong Prognosticator in the Subgroup Aged More Than 50 Years Regardless of the Molecular Subtype of Breast Cancer: A Study Based on the Nationwide Korean Breast Cancer Registry Database
Source: PubMed Central journal article supplement — Cancer Res Treat. 2017 Feb 2;49(4):1114–26. doi: 10.4143/crt.2016.528 (PMC5654170; doi:10.4143/crt.2016.528), 2017-02-02
Supplement: crt-2016-528-suppl3.pdf [file crt-2016-528-suppl3.pdf]

**S3 Table.** Univariate and multivariate analyses with respect to overall survival in all subjects.

| Characteristic                           | Univariate analysis |             |         | Multivariate analysis          |             |         |                               |             |         |                              |             |         |
|------------------------------------------|---------------------|-------------|---------|--------------------------------|-------------|---------|-------------------------------|-------------|---------|------------------------------|-------------|---------|
|                                          | Hazard ratio        | 95% CI      | p-value | Biological model <sup>a)</sup> |             |         | Treatment model <sup>b)</sup> |             |         | Combined model <sup>c)</sup> |             |         |
|                                          |                     |             |         | Hazard ratio                   | 95% CI      | p-value | Hazard ratio                  | 95% CI      | p-value | Hazard ratio                 | 95% CI      | p-value |
| Education level (high vs. low)           | 0.677               | 0.643-0.712 | < 0.001 | 0.869                          | 0.798-0.945 | < 0.001 | 0.794                         | 0.743-0.849 | < 0.001 | 0.974                        | 0.878-1.082 | 0.625   |
| Age (> 50 vs. ≤ 50)                      | 1.502               | 1.428-1.581 | < 0.001 | 1.350                          | 1.242-1.467 | < 0.001 | -                             | -           | -       | 1.282                        | 1.158-1.419 | < 0.001 |
| Tumor size (> 2 cm vs. ≤ 2 cm)           | 2.631               | 2.490-2.780 | < 0.001 | 1.921                          | 1.718-2.149 | < 0.001 | -                             | -           | -       | 1.571                        | 1.362-1.812 | < 0.001 |
| Node positivity (yes vs. no)             | 3.038               | 2.881-3.204 | < 0.001 | 2.393                          | 2.145-2.669 | < 0.001 | -                             | -           | -       | 2.017                        | 1.745-2.331 | < 0.001 |
| Stage (II, III vs. I)                    | 3.288               | 3.073-3.518 | < 0.001 | 0.865                          | 0.731-1.024 | 0.091   | -                             | -           | -       | 1.007                        | 0.811-1.250 | 0.951   |
| Hormone receptor (positive vs. negative) | 0.563               | 0.533-0.594 | < 0.001 | 0.584                          | 0.538-0.635 | < 0.001 | -                             | -           | -       | 0.645                        | 0.552-0.754 | < 0.001 |
| HER2 (positive vs. negative)             | 1.328               | 1.242-1.419 | < 0.001 | 0.984                          | 0.905-1.070 | 0.706   | -                             | -           | -       | 0.828                        | 0.747-0.918 | < 0.001 |
| Histologic grade (3 vs. 1, 2)            | 1.896               | 1.792-2.006 | < 0.001 | 1.436                          | 1.323-1.559 | < 0.001 | -                             | -           | -       | 1.464                        | 1.323-1.620 | < 0.001 |
| Lymphovascular invasion (yes vs. no)     | 2.360               | 2.216-2.514 | < 0.001 | 1.557                          | 1.433-1.692 | < 0.001 | -                             | -           | -       | 1.532                        | 1.380-1.701 | < 0.001 |
| Body mass index (> 25 vs. ≤ 25)          | 1.246               | 1.181-1.315 | < 0.001 | 1.023                          | 0.944-1.109 | 0.581   | -                             | -           | -       | 1.061                        | 0.962-1.171 | 0.234   |
| Operation period                         |                     |             | < 0.001 |                                |             |         |                               |             | < 0.001 |                              |             | < 0.001 |
| 1987-2005                                | Reference           |             |         | -                              |             |         | Reference                     |             |         | Reference                    |             |         |
| 2006-2010                                | 0.735               | 0.693-0.778 | < 0.001 | -                              | -           | -       | 0.846                         | 0.786-0.910 | < 0.001 | 0.882                        | 0.797-0.977 | 0.016   |
| 2011-2014                                | 0.541               | 0.480-0.608 | < 0.001 | -                              | -           | -       | 0.627                         | 0.542-0.727 | < 0.001 | 0.629                        | 0.522-0.758 | < 0.001 |
| Operation, mastectomy vs lumpectomy      | 2.448               | 2.312-2.592 | < 0.001 | -                              | -           | -       | 3.915                         | 3.627-4.226 | < 0.001 | 2.247                        | 2.001-2.524 | < 0.001 |
| Radiation therapy, yes vs no             | 0.863               | 0.817-0.912 | < 0.001 | -                              | -           | -       | 2.533                         | 2.300-2.791 | < 0.001 | 1.703                        | 1.479-1.961 | < 0.001 |
| Chemotherapy, yes vs no                  | 1.556               | 1.449-1.672 | < 0.001 | -                              | -           | -       | 1.300                         | 1.170-1.445 | < 0.001 | 0.746                        | 0.625-0.890 | 0.001   |
| Hormonal therapy, yes vs no              | 0.564               | 0.529-0.601 | < 0.001 | -                              | -           | -       | 0.577                         | 0.534-0.623 | < 0.001 | 0.745                        | 0.635-0.874 | < 0.001 |

Values are presented as number (%). Three models including the biological model, treatment model, and combined model were used for multivariate analyses. HR, hazard ratio; CI, confidence interval; HER2, human epidermal growth factor receptor 2. <sup>a)</sup>Education level was adjusted with eight factors including tumor size, node positivity, stage, hormonal receptor, HER2, histologic grade, lymphovascular invasion, and body mass index, <sup>b)</sup>Education level was adjusted with five factors including operation time, operation, radiation therapy, chemotherapy and hormonal therapy, <sup>c)</sup>Education level was adjusted with all thirteen factors described above.
