# Supplementary material for: Education Level Is a Strong Prognosticator in the Subgroup Aged More Than 50 Years Regardless of the Molecular Subtype of Breast Cancer: A Study Based on the Nationwide Korean Breast Cancer Registry Database
Source: PubMed Central journal article supplement — Cancer Res Treat. 2017 Feb 2;49(4):1114–26. doi: 10.4143/crt.2016.528 (PMC5654170; doi:10.4143/crt.2016.528), 2017-02-02
Supplement: crt-2016-528-suppl4.pdf [file crt-2016-528-suppl4.pdf]

**S4 Table.** Analyses of treatment modalities according to the education level and clinicopathologic characteristics in all subjects

| Characteristic       | Operation     |               | Chi-square test<br>p-value | Radiation therapy |               | Chi-square test<br>p-value | Chemotherapy  |               | Chi-square test<br>p-value | Endocrine therapy |               | Chi-square test<br>p-value |
|----------------------|---------------|---------------|----------------------------|-------------------|---------------|----------------------------|---------------|---------------|----------------------------|-------------------|---------------|----------------------------|
|                      | Lumpectomy    | Mastectomy    |                            | No                | Yes           |                            | No            | Yes           |                            | No                | Yes           |                            |
| All                  |               |               |                            |                   |               |                            |               |               |                            |                   |               |                            |
| Low education level  | 9,568 (47.7)  | 10,477 (52.3) | < 0.001                    | 7,392 (42.7)      | 9,916 (57.3)  | < 0.001                    | 4,917 (27.2)  | 13,129 (72.8) | 0.662                      | 5,481 (43.6)      | 7,091 (56.4)  | < 0.001                    |
| High education level | 25,430 (59.2) | 17,503 (40.8) |                            | 12,519 (32.6)     | 25,880 (67.4) |                            | 10,903 (27.4) | 28,857 (72.6) |                            | 11,073 (36.6)     | 19,188 (63.4) |                            |
| Age ≤ 50 yr          |               |               |                            |                   |               |                            |               |               |                            |                   |               |                            |
| Low education level  | 2,753 (47.5)  | 3,038 (52.5)  | < 0.001                    | 2,074 (40.9)      | 3,000 (59.1)  | < 0.001                    | 899 (16.8)    | 4,466 (83.2)  | < 0.001                    | 1,524 (40.6)      | 2,232 (59.4)  | < 0.001                    |
| High education level | 18,373 (59.2) | 12,640 (40.8) |                            | 8,948 (32.1)      | 18,885 (67.9) |                            | 7,293 (25.3)  | 21,535 (74.7) |                            | 7,719 (35.3)      | 14,170 (64.7) |                            |
| Age > 50 yr          |               |               |                            |                   |               |                            |               |               |                            |                   |               |                            |
| Low education level  | 6,814 (47.8)  | 7,437 (52.2)  | < 0.001                    | 5,317 (43.5)      | 6,915 (56.5)  | < 0.001                    | 4,018 (31.7)  | 8,661 (68.3)  | 0.029                      | 3,955 (44.9)      | 4,859 (55.1)  | < 0.001                    |
| High education level | 7,055 (59.2)  | 4,863 (40.8)  |                            | 3,571 (33.8)      | 6,994 (66.2)  |                            | 3,610 (33.0)  | 7,321 (67.0)  |                            | 3,354 (40.1)      | 5,017 (59.9)  |                            |
| Tumor size ≤ 2 cm    |               |               |                            |                   |               |                            |               |               |                            |                   |               |                            |
| Low education level  | 6,379 (60.9)  | 4,095 (39.1)  | < 0.001                    | 3,435 (37.9)      | 5,627 (62.1)  | < 0.001                    | 3,621 (39.0)  | 5,664 (61.0)  | 0.655                      | 2,564 (37.8)      | 4,212 (62.2)  | < 0.001                    |
| High education level | 17,082 (69.6) | 7,464 (30.4)  |                            | 6,431 (29.2)      | 15,559 (70.8) |                            | 8,847 (39.3)  | 13,683 (60.7) |                            | 5,510 (31.3)      | 12,107 (68.7) |                            |
| Tumor size > 2 cm    |               |               |                            |                   |               |                            |               |               |                            |                   |               |                            |
| Low education level  | 3,000 (32.4)  | 6,247 (67.6)  | < 0.001                    | 3,846 (48.3)      | 4,120 (51.7)  | < 0.001                    | 1,189 (14.0)  | 7,281 (86.0)  | < 0.001                    | 2,745 (49.5)      | 2,802 (50.5)  | < 0.001                    |
| High education level | 7,692 (44.2)  | 9,707 (55.8)  |                            | 5,769 (37.0)      | 9,813 (63.0)  |                            | 1,643 (10.0)  | 14,735 (90.0) |                            | 5,032 (42.3)      | 6,854 (57.7)  |                            |
| Node negative        |               |               |                            |                   |               |                            |               |               |                            |                   |               |                            |
| Low education level  | 6,749 (55.2)  | 5,469 (44.8)  | < 0.001                    | 4,749 (45.0)      | 5,804 (55.0)  | < 0.001                    | 4,177 (38.6)  | 6,652 (61.4)  | 0.113                      | 3,429 (45.1)      | 4,171 (54.9)  | < 0.001                    |
| High education level | 18,234 (67.0) | 8,985 (33.0)  |                            | 8,049 (33.0)      | 16,348 (67.0) |                            | 9,863 (39.5)  | 15,131 (60.5) |                            | 7,240 (37.6)      | 12,039 (62.4) |                            |
| Node positive        |               |               |                            |                   |               |                            |               |               |                            |                   |               |                            |
| Low education level  | 2,721 (35.6)  | 4,932 (64.4)  | < 0.001                    | 2,570 (38.8)      | 4,056 (61.2)  | < 0.001                    | 662 (9.3)     | 6,421 (90.7)  | < 0.001                    | 2,000 (41.0)      | 2,880 (59.0)  | < 0.001                    |
| High education level | 6,914 (45.2)  | 8,372 (54.8)  |                            | 4,328 (31.5)      | 9,399 (68.5)  |                            | 860 (5.9)     | 13,613 (94.1) |                            | 3,689 (34.3)      | 7,051 (65.7)  |                            |
| Stage I              |               |               |                            |                   |               |                            |               |               |                            |                   |               |                            |
| Low education level  | 4,975 (63.4)  | 2,871 (36.6)  | < 0.001                    | 2,624 (38.5)      | 4,188 (61.5)  | < 0.001                    | 3,363 (48.7)  | 3,536 (51.3)  | 0.518                      | 1,968 (38.6)      | 3,137 (61.4)  | < 0.001                    |
| High education level | 13,606 (72.2) | 5,241 (27.8)  |                            | 4,912 (29.0)      | 12,040 (71.0) |                            | 8,469 (49.2)  | 8,742 (50.8)  |                            | 4,297 (31.4)      | 9,368 (68.6)  |                            |
| Stage II, III        |               |               |                            |                   |               |                            |               |               |                            |                   |               |                            |
| Low education level  | 4,325 (36.9)  | 7,409 (63.1)  | < 0.001                    | 4,626 (45.6)      | 5,510 (54.4)  | < 0.001                    | 1,407 (13.1)  | 9,356 (86.9)  | < 0.001                    | 3,345 (46.7)      | 3,812 (53.3)  | < 0.001                    |
| High education level | 10,991 (48.1) | 11,863 (51.9) |                            | 7,239 (35.3)      | 13,249 (64.7) |                            | 1,965 (9.1)   | 19,540 (90.9) |                            | 6,233 (39.6)      | 9,492 (60.4)  |                            |

|                            |               |               |         |               |               |         |              |               |         |              |               |         |
|----------------------------|---------------|---------------|---------|---------------|---------------|---------|--------------|---------------|---------|--------------|---------------|---------|
| Hormonal receptor negative |               |               |         |               |               |         |              |               |         |              |               |         |
| Low education level        | 2,511 (41.6)  | 3,522 (58.4)  | < 0.001 | 2,469 (45.2)  | 2,994 (54.8)  | < 0.001 | 789 (13.8)   | 4,938 (86.2)  | < 0.001 | NA           | NA            |         |
| High education level       | 5,952 (54.8)  | 4,919 (45.2)  |         | 3,401 (33.9)  | 6,619 (66.1)  |         | 1,211 (11.6) | 9,208 (88.4)  |         | NA           | NA            |         |
| Hormonal receptor positive |               |               |         |               |               |         |              |               |         |              |               |         |
| Low education level        | 6,235 (51.3)  | 5,926 (48.7)  | < 0.001 | 4,428 (40.4)  | 6,542 (59.6)  | < 0.001 | 3,836 (33.8) | 7,518 (66.2)  | 0.193   | 721 (10.3)   | 6,268 (89.7)  | < 0.001 |
| High education level       | 17,585 (60.8) | 11,319 (39.2) |         | 8,346 (31.3)  | 18,349 (68.7) |         | 9,113 (33.1) | 18,418 (66.9) |         | 1,717 (8.9)  | 17,592 (91.1) |         |
| Lumpectomy                 |               |               |         |               |               |         |              |               |         |              |               |         |
| Low education level        | NA            | NA            |         | 686 (8.3)     | 7,586 (91.7)  | < 0.001 | 2,653 (31.6) | 5,750 (68.4)  | 0.575   | 2,328 (29.5) | 5,551 (70.5)  | 0.001   |
| High education level       | NA            | NA            |         | 1,386 (6.2)   | 21,129 (93.8) |         | 7,347 (31.9) | 15,681 (68.1) |         | 6,023 (27.5) | 15,858 (72.5) |         |
| Mastectomy                 |               |               |         |               |               |         |              |               |         |              |               |         |
| Low education level        | NA            | NA            |         | 6,619 (75.3)  | 2,173 (24.7)  | < 0.001 | 2,163 (23.1) | 7,219 (76.9)  | < 0.001 | 3,056 (68.0) | 1,438 (32.0)  | < 0.001 |
| High education level       | NA            | NA            |         | 10,940 (71.2) | 4,418 (28.8)  |         | 3,378 (20.9) | 12,783 (79.1) |         | 4,844 (61.1) | 3,084 (38.9)  |         |

Values are presented as number (%). NA, not acquired.
