# Supplementary material for: Education Level Is a Strong Prognosticator in the Subgroup Aged More Than 50 Years Regardless of the Molecular Subtype of Breast Cancer: A Study Based on the Nationwide Korean Breast Cancer Registry Database
Source: PubMed Central journal article supplement — Cancer Res Treat. 2017 Feb 2;49(4):1114–26. doi: 10.4143/crt.2016.528 (PMC5654170; doi:10.4143/crt.2016.528), 2017-02-02
Supplement: crt-2016-528-suppl5.pdf [file crt-2016-528-suppl5.pdf]

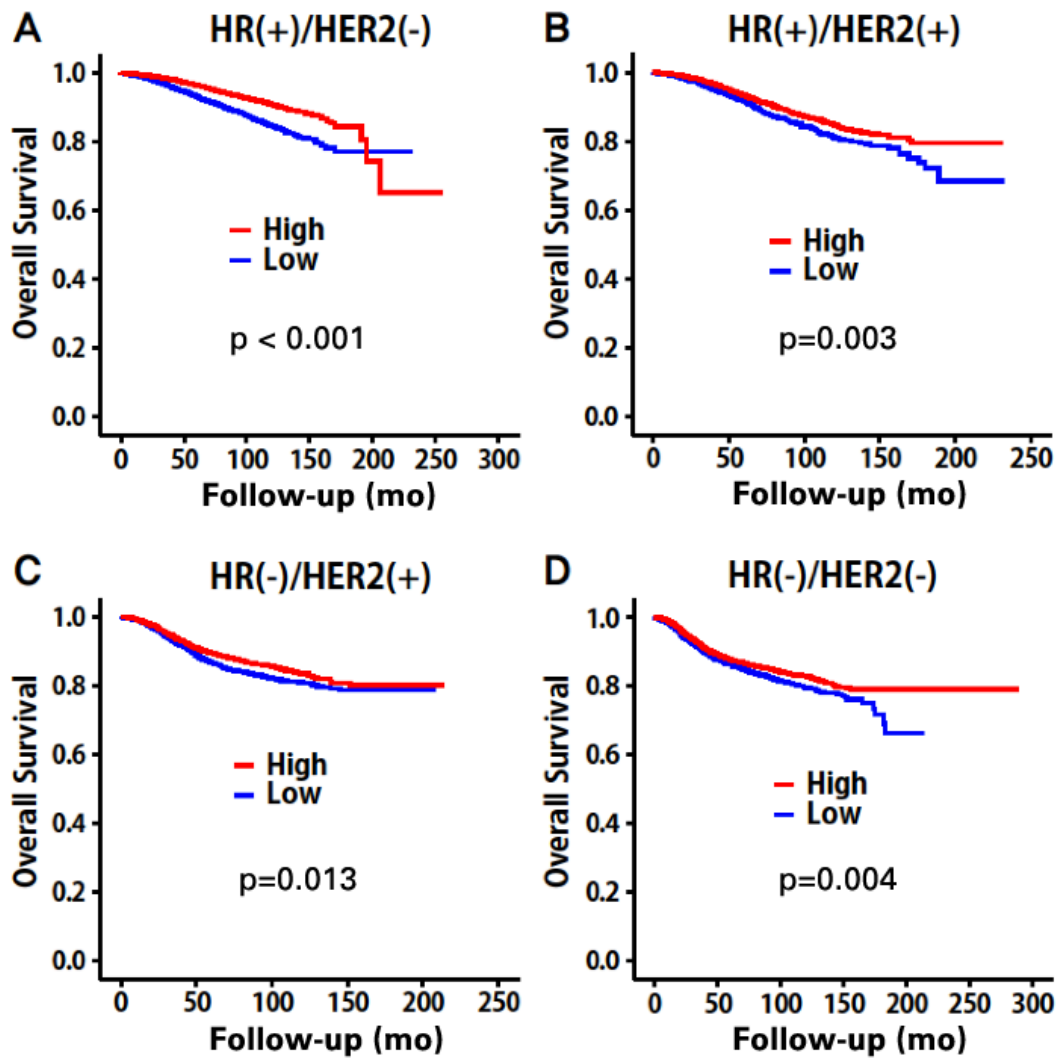

**S5 Fig.** Overall survival curves according to the education level in 4 molecular subtypes including HR(+)/HER2(-) (A), HR(+)/HER2(+) (B), HR(-)/HER2(+) (C), and HR(-)/HER2(-) (D) in all subjects. HR, hormone receptor; HER2, human epidermal growth factor receptor 2.
